# Supplementary material for: Comparison between Dual-Energy X-ray Absorptiometry and Bioelectrical Impedance Analyses for Accuracy in Measuring Whole Body Muscle Mass and Appendicular Skeletal Muscle Mass
Source: PubMed Central journal article supplement (PMC6024648; doi:10.3390/nu10060738), 2018-06-07
Supplement: nutrients-10-00738-s001.pdf [file nutrients-10-00738-s001.pdf]

## Supplementary Files

**Table S1.** Gender-specific subgroup analyses of mean differences between DXA and BIA muscle mass estimates according to BMI and age categories.

| WBMM                       | <i>n</i> | DXA-WBMM (kg) | BIA-WBMM (kg) | BIA-WBMM – DXA-WBMM (kg) | * <i>p</i> | ICC   | † <i>p</i> |
|----------------------------|----------|---------------|---------------|--------------------------|------------|-------|------------|
| <b>Men</b>                 |          |               |               |                          |            |       |            |
| BMI < 25 kg/m <sup>2</sup> | 107      | 43.2 ± 3.9    | 46.5 ± 4.3    | 3.3 ± 1.8                | <0.001     | 0.907 | 0.004      |
| BMI ≥ 25 kg/m <sup>2</sup> | 105      | 50.4 ± 6.7    | 52.1 ± 7.4    | 1.7 ± 2.2                | <0.001     | 0.957 |            |
| Age < 50 years             | 23       | 56.6 ± 7.5    | 58.9 ± 7.8    | 2.3 ± 2.3                | <0.001     | 0.957 | 0.215      |
| Age ≥ 50 years             | 166      | 45.7 ± 5.4    | 48.3 ± 5.6    | 2.6 ± 2.2                | <0.001     | 0.924 |            |
| <b>Women</b>               |          |               |               |                          |            |       |            |
| BMI < 25 kg/m <sup>2</sup> | 139      | 31.0 ± 3.0    | 33.9 ± 3.5    | 3.0 ± 1.6                | <0.001     | 0.887 | 0.089      |
| BMI ≥ 25 kg/m <sup>2</sup> | 154      | 36.8 ± 4.6    | 38.1 ± 4.9    | 1.3 ± 1.9                | <0.001     | 0.923 |            |
| Age < 50 years             | 31       | 39.1 ± 5.4    | 41.1 ± 5.3    | 2.0 ± 1.6                | <0.001     | 0.954 | 0.336      |
| Age ≥ 50 years             | 262      | 33.4 ± 4.4    | 35.5 ± 4.3    | 2.1 ± 2.0                | <0.001     | 0.897 |            |
| ASMM                       | <i>n</i> | DXA-ASMM (kg) | BIA-ASMM (kg) | BIA-ASMM – DXA-ASMM (kg) | * <i>p</i> | ICC   | † <i>p</i> |
| <b>Men</b>                 |          |               |               |                          |            |       |            |
| BMI < 25 kg/m <sup>2</sup> | 107      | 18.2 ± 1.9    | 20.8 ± 2.3    | 2.5 ± 1.1                | <0.001     | 0.881 | 0.001      |
| BMI ≥ 25 kg/m <sup>2</sup> | 105      | 21.5 ± 3.4    | 23.5 ± 3.6    | 2.0 ± 1.1                | <0.001     | 0.949 |            |
| Age < 50 years             | 23       | 25.0 ± 3.8    | 26.8 ± 3.9    | 1.9 ± 1.4                | <0.001     | 0.937 | 0.520      |
| Age ≥ 50 years             | 166      | 19.3 ± 2.6    | 21.7 ± 2.8    | 2.3 ± 1.1                | <0.001     | 0.920 |            |
| <b>Women</b>               |          |               |               |                          |            |       |            |
| BMI < 25 kg/m <sup>2</sup> | 139      | 12.3 ± 1.4    | 14.1 ± 1.8    | 1.8 ± 0.9                | <0.001     | 0.868 | 0.003      |
| BMI ≥ 25 kg/m <sup>2</sup> | 154      | 14.6 ± 2.3    | 16.3 ± 2.6    | 1.7 ± 1.0                | <0.001     | 0.932 |            |
| Age < 50 years             | 31       | 16.1 ± 2.8    | 18.0 ± 2.8    | 1.9 ± 0.8                | <0.001     | 0.960 | 0.433      |
| Age ≥ 50 years             | 262      | 13.2 ± 1.9    | 15.0 ± 2.3    | 1.7 ± 1.0                | <0.001     | 0.909 |            |

Data are expressed as the mean ± SD. \**p* values by paired t test between DXA and BIA. †*p* values by Fisher's z-test between correlation coefficients. WBMM, whole body muscle mass; ASMM, appendicular skeletal muscle mass; BIA, bioelectrical impedance analysis; DXA, dual-energy X-ray absorptiometry.

**Table S2.** Bias-corrected percentile intervals of residuals in bootstrapping method.

| <b>For Whole Body Muscle Mass (WBMM)</b>            |          |           |         |          |
|-----------------------------------------------------|----------|-----------|---------|----------|
|                                                     | Original | Boot Bias | Boot SE | Boot Med |
| (Intercept)                                         | 2.724    | 0.125     | 1.904   | 2.769    |
| WBMM by BIA                                         | 0.649    | -0.006    | 0.079   | 0.648    |
| I × (WBMM by BIA <sup>2</sup> )                     | 0.002    | 0.000     | 0.001   | 0.002    |
| BMI                                                 | 0.249    | 0.001     | 0.052   | 0.249    |
| Sex                                                 | -2.678   | -0.014    | 0.230   | -2.687   |
| Fat percent by BIA                                  | 0.107    | 0.000     | 0.024   | 0.108    |
| <b>For Appendicular Skeletal Muscle Mass (ASMM)</b> |          |           |         |          |
|                                                     | Original | Boot Bias | Boot SE | Boot Med |
| (Intercept)                                         | 4.9049   | -0.0246   | 0.6694  | 4.8770   |
| ASMM by BIA                                         | 0.2664   | 0.0023    | 0.0607  | 0.2678   |
| I × (ASMM by BIA <sup>2</sup> )                     | 0.0107   | -0.0001   | 0.0014  | 0.0107   |
| BMI                                                 | 0.2568   | 0.0011    | 0.0246  | 0.2574   |
| Sex                                                 | -1.1714  | -0.0032   | 0.1312  | -1.1747  |
| Fat percent by BIA                                  | -0.0592  | -0.0003   | 0.0116  | -0.0595  |

**Table S3.** Optimism average (bootstrap performance – test performance) values.

| <b>For Whole Body Muscle Mass (WBMM)</b>            |                |          |         |          |                 |          |
|-----------------------------------------------------|----------------|----------|---------|----------|-----------------|----------|
|                                                     | Original index | training | test    | optimism | Corrected index | <i>n</i> |
| R-square                                            | 0.9735         | 0.9737   | 0.9732  | 0.0005   | 0.973           | 1000     |
| MSE                                                 | 1.872          | 1.8481   | 1.8931  | -0.045   | 1.917           | 1000     |
| G                                                   | 9.3005         | 9.2833   | 9.2995  | -0.0163  | 9.3167          | 1000     |
| Intercept                                           | 0              | 0        | 0.0057  | -0.0057  | 0.0057          | 1000     |
| Slope                                               | 1              | 1        | 0.9999  | 0.0001   | 0.9999          | 1000     |
| <b>For Appendicular Skeletal Muscle Mass (ASMM)</b> |                |          |         |          |                 |          |
|                                                     | Original index | training | test    | optimism | Corrected index | <i>n</i> |
| R-square                                            | 0.9569         | 0.9571   | 0.9564  | 0.0007   | 0.9562          | 1000     |
| MSE                                                 | 0.7309         | 0.7226   | 0.7392  | -0.0166  | 0.7475          | 1000     |
| g                                                   | 4.5452         | 4.5315   | 4.5447  | -0.0132  | 4.5584          | 1000     |
| Intercept                                           | 0              | 0        | -0.0037 | 0.0037   | -0.0037         | 1000     |
| Slope                                               | 1              | 1        | 1.0003  | -0.0003  | 1.0003          | 1000     |

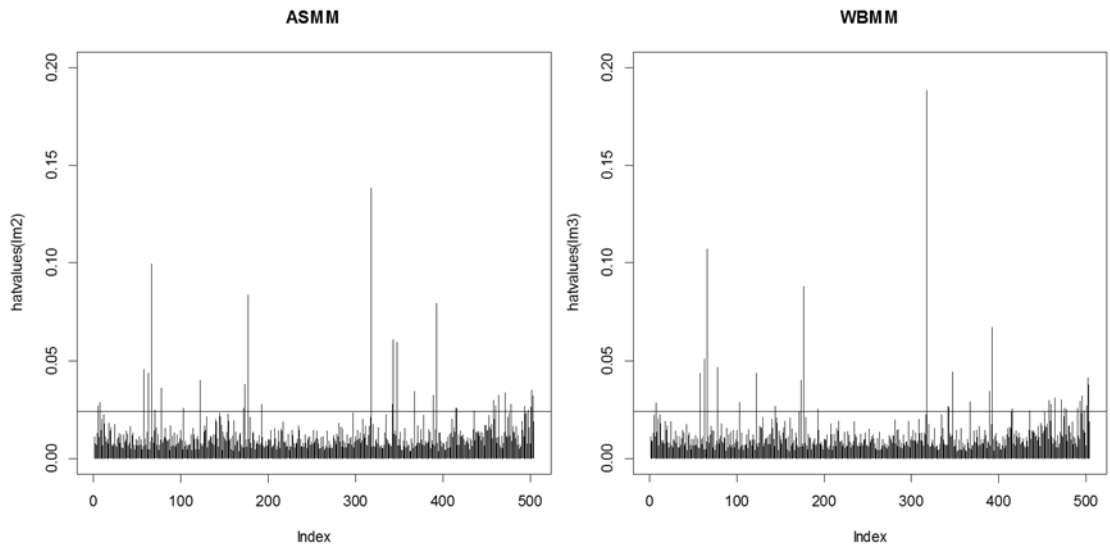

Figure S1. The leverage plots for ASMM and WBMM.

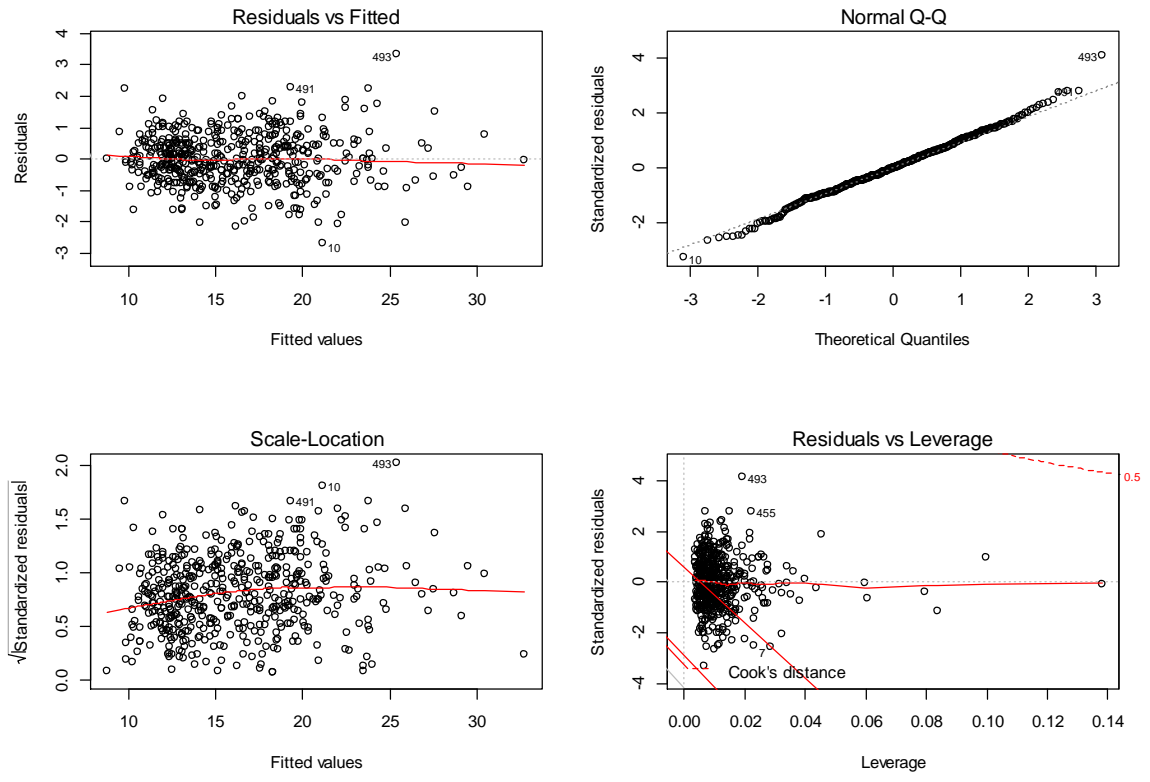

Figure S2. A residual plot for ASMM.

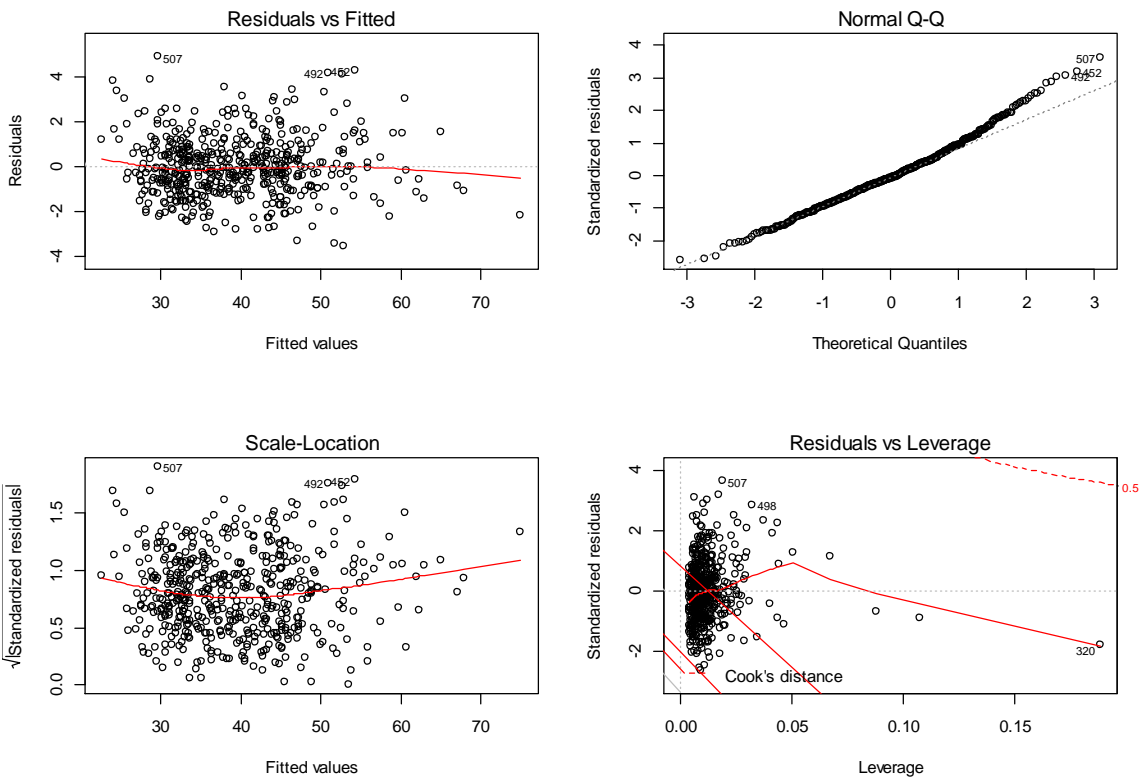

Figure S3. A residual plot for WBMM.
